# Supplementary material
Source: PubMed Central journal article supplement (PMC4512910)
Supplement: NIHMS696118-supplement-Supplemental_Material.pdf [file NIHMS696118-supplement-Supplemental_Material.pdf]

**SUPPLEMENTAL MATERIAL**

**Supplemental Table 1. Baseline Characteristics in Patients with and without Complete Data**

| Characteristic                                          | Complete (N=1631)  | Incomplete<br>(N=700) | p-value |
|---------------------------------------------------------|--------------------|-----------------------|---------|
| Age                                                     | 59.3 (51.3 - 68.2) | 59.1 (50.9 - 67.6)    | 0.8261  |
| Female, n (%)                                           | 464 (28)           | 197 (28)              | 0.8806  |
| Race, n (%)                                             |                    |                       | 0.0002  |
| Black                                                   | 574 (35)           | 175/665 (26)          |         |
| White                                                   | 978 (60)           | 448/665 (67)          |         |
| Other                                                   | 79 (5)             | 42/665 (6)            |         |
| NYHA class at randomization, n (%)                      |                    |                       | 0.8693  |
| II                                                      | 1036 (64)          | 441 (63)              |         |
| III                                                     | 580 (36)           | 251 (36)              |         |
| IV                                                      | 15 (1)             | 8 (1)                 |         |
| Systolic blood pressure (mmHg)                          | N=1631             | N=696                 | 0.2315  |
| Median (25 <sup>th</sup> , 75 <sup>th</sup> percentile) | 112 (101 - 126)    | 110 (100 - 125)       |         |
| Diastolic blood pressure (mmHg)                         | N=1631             | N=695                 | 0.8398  |
| Median (25 <sup>th</sup> , 75 <sup>th</sup> percentile) | 70 (62 - 79)       | 70 (60 - 78)          |         |
| Rest heart rate (bpm)                                   | N=1631             | N=695                 | 0.1876  |
| Median (25 <sup>th</sup> , 75 <sup>th</sup> percentile) | 70 (63 - 77)       | 70 (64 - 78)          |         |
| Ischemic etiology of HF, n (%)                          | 824 (51)           | 373 (53)              | 0.2209  |
| LVEF                                                    | N=1631             | N=696                 | 0.6093  |
| Median (25 <sup>th</sup> , 75 <sup>th</sup> percentile) | 25 (20 - 30)       | 25 (20 - 30)          |         |
| Mitral regurgitation, n (%)                             | 203 (12)           | 53/504 (11)           | 0.2436  |
| History of diabetes, n (%)                              | 536 (33)           | 212 (30)              | 0.2217  |
| Current smoking, n (%)                                  | 265 (16)           | 123/689 (18)          | 0.3441  |
| History of hypertension, n (%)                          | 1009 (62)          | 379/697 (54)          | 0.0004  |
| History of MI, n (%)                                    | 671 (41)           | 308 (44)              | 0.1998  |
| Hyperlipidemia, n (%)                                   | 1065 (65)          | 463/697 (66)          | 0.5990  |
| History of a-fib or a-flutter, n (%)                    | 351 (22)           | 137/699 (20)          | 0.2963  |
| History of stroke, n (%)                                | 170 (10)           | 68 (10)               | 0.6044  |
| History of depression, n (%)                            | 338 (21)           | 152 (22)              | 0.5905  |
| Current CCS angina class, n (%)                         |                    |                       | 0.2776  |
| 0                                                       | 1354 (83)          | 596/697 (86)          |         |
| 1                                                       | 144 (9)            | 56/697 (8)            |         |

|                                                         |                    |                   |        |
|---------------------------------------------------------|--------------------|-------------------|--------|
| $\geq 2$                                                | 133 (8)            | 45/697 (6)        |        |
| Highest level of education, n (%)                       |                    |                   | 0.5253 |
| Less than high school                                   | 185 (11)           | 100/648 (15)      |        |
| High school or equivalent                               | 473 (29)           | 162/648 (25)      |        |
| Some college but no degree                              | 434 (27)           | 175/648 (27)      |        |
| Associates degree or diploma                            | 147 (9)            | 54/648 (8)        |        |
| College graduate                                        | 257 (16)           | 99/648 (15)       |        |
| Completed graduate school                               | 135 (8)            | 58/648 (9)        |        |
| Married, n (%)                                          | 936 (57)           | 405/692 (59)      | 0.6116 |
| Baseline medication and devices, n (%)                  |                    |                   |        |
| Beta blocker                                            | 1545 (95)          | 658 (94)          | 0.4799 |
| ACE-I/ARB                                               | 1538 (94)          | 661 (94)          | 0.9005 |
| Loop diuretic                                           | 1299 (80)          | 517 (74)          | 0.0020 |
| Aldosterone antagonist                                  | 738 (45)           | 313 (45)          | 0.8123 |
| ICD                                                     | 675 (41)           | 263 (38)          | 0.0852 |
| Bi-ventricular pacemaker                                | 300 (18)           | 119 (17)          | 0.4218 |
| Functional measures                                     |                    |                   |        |
| Six-minute walk distance (meters)                       | N=1631             | N=649             | 0.1665 |
| Median (25 <sup>th</sup> , 75 <sup>th</sup> percentile) | 368 (297 – 433)    | 375.8 (300 - 442) |        |
| Exercise duration, CPX test (min)                       | N=1631             | N=678             | 0.7514 |
| Median (25 <sup>th</sup> , 75 <sup>th</sup> percentile) | 9.7 (7 - 12)       | 9.5 (6.9 - 12)    |        |
| Peak VO <sub>2</sub> in mL/kg/min, CPX test             | N=1631             | N=644             | 0.0172 |
| Median (25 <sup>th</sup> , 75 <sup>th</sup> percentile) | 14.3 (11.3 - 17.6) | 14.8 (12 - 18.1)  |        |
| Laboratory values                                       |                    |                   |        |
| Sodium in mmol/L                                        | N=1631             | N=439             | 0.5821 |
| Median (25 <sup>th</sup> , 75 <sup>th</sup> percentile) | 139 (137 - 141)    | 139 (137 - 141)   |        |
| Creatinine in mg/dL                                     | N=1631             | N=460             | 0.9310 |
| Median (25 <sup>th</sup> , 75 <sup>th</sup> percentile) | 1.2 (1 - 1.5)      | 1.2 (1 - 1.42)    |        |
| Blood urea nitrogen in mg/dL                            | N=1631             | N=394             | 0.4074 |
| Median (25 <sup>th</sup> , 75 <sup>th</sup> percentile) | 20 (15 - 28)       | 21 (16 - 29)      |        |

---

Abbreviations: ACE-I, angiotensin-converting enzyme inhibitor; a-fib, atrial fibrillation; ARB, angiotensin receptor blocker; a-flutter, atrial flutter; CCS, Canadian Cardiomyopathy Society; CPX, cardiopulmonary stress testing; HF, heart failure; ICD, internal cardioverter defibrillator; LVEF, left ventricular ejection fraction; MI, myocardial infarction; NYHA, New York Heart Association; VO<sub>2</sub>, oxygen consumption

**Supplemental Table 2. Model Comparisons for Death or Hospitalization Endpoint (Censored at 30 Months)**

| Predictors                                                       | Harrell<br>C-index<br>(95% CI) | NRI<br>(95% CI) <sup>a</sup> | NRI for events<br>(95% CI) <sup>a</sup> | NRI for<br>non-events<br>(95% CI) <sup>a</sup> | Additional<br>cost,<br>dollars | LR<br>p-value |
|------------------------------------------------------------------|--------------------------------|------------------------------|-----------------------------------------|------------------------------------------------|--------------------------------|---------------|
| <b>Model comparisons without NT proBNP (N=1631, 1031 events)</b> |                                |                              |                                         |                                                |                                |               |
| Clinical information (C)                                         | 0.62<br>(0.60, 0.64)           |                              |                                         |                                                |                                |               |
| C + KCCQ total symptom score (K)                                 | 0.63<br>(0.61, 0.64)           | 0.017<br>(-0.036, 0.071)     | -0.001<br>(-0.027, 0.025)               | 0.018<br>(-0.023, 0.059)                       | 0.00                           | <0.0001       |
| C + K + Laboratory assessments (L)                               | 0.64<br>(0.62, 0.65)           | 0.045<br>(-0.009, 0.099)     | 0.002<br>(-0.027, 0.031)                | 0.043<br>(-0.006, 0.093)                       | 11.63                          | <0.0001       |
| C + K + L + Echocardiography parameters (E)                      | 0.64<br>(0.63, 0.66)           | 0.055<br>(-0.007, 0.118)     | 0.007<br>(-0.028, 0.042)                | 0.048<br>(-0.003, 0.099)                       | 201.14                         | <0.0001       |
| C + K + L + E + Six-minute walk distance (S)                     | 0.65<br>(0.63, 0.66)           | 0.079<br>(0.017, 0.141)      | 0.011<br>(-0.024, 0.046)                | 0.068<br>(0.023, 0.114)                        | 258.30                         | <0.0001       |
| C + K + L + E + S + Exercise parameters (full)                   | 0.65<br>(0.64, 0.67)           | 0.109<br>(0.037, 0.181)      | 0.029<br>(-0.013, 0.071)                | 0.080<br>(0.026, 0.134)                        | 425.69                         | <0.0001       |
| <b>Model comparisons with NT proBNP (N=1023, 646 events)</b>     |                                |                              |                                         |                                                |                                |               |
| Clinical information (C)                                         | 0.63<br>(0.61, 0.65)           |                              |                                         |                                                |                                |               |
| C + KCCQ total symptom score (K)                                 | 0.64<br>(0.61, 0.66)           | 0.016<br>(-0.036, 0.068)     | 0.000<br>(-0.026, 0.026)                | 0.016<br>(-0.025, 0.056)                       | 0.00                           | 0.0020        |
| C + K + Laboratory assessments (L)                               | 0.67<br>(0.64, 0.69)           | 0.113<br>(0.051, 0.174)      | 0.046<br>(0.002, 0.091)                 | 0.066<br>(0.018, 0.114)                        | 58.29                          | <0.0001       |
| C + K + L + Echocardiography parameters (E)                      | 0.67<br>(0.65, 0.69)           | 0.127<br>(0.057, 0.197)      | 0.045<br>(0.000, 0.090)                 | 0.082<br>(0.029, 0.135)                        | 247.80                         | <0.0001       |
| C + K + L + E + Six-minute walk distance (S)                     | 0.67<br>(0.65, 0.69)           | 0.140<br>(0.078, 0.202)      | 0.042<br>(-0.003, 0.086)                | 0.098<br>(0.055, 0.141)                        | 304.96                         | <0.0001       |
| C + K + L + E + S + Exercise parameters (full)                   | 0.67<br>(0.65, 0.69)           | 0.162<br>(0.090, 0.233)      | 0.056<br>(0.007, 0.104)                 | 0.106<br>(0.052, 0.160)                        | 472.35                         | <0.0001       |

---

<sup>a</sup>The NRI compares each model to the model with clinical information only (C); it has 2 categories split at the incidence of death at 30 months, 0.14 in all patients and 0.13 in patients with non-missing NT-proBNP. The standard error for determining the 95% CI comes from the standard deviation of NRIs coming from 50 bootstrap samples with replacement.

Abbreviations: CI, confidence interval; KCCQ, Kansas City Cardiomyopathy Questionnaire; LR, likelihood ratio; NRI, Net Reclassification Index; NT-proBNP, N-terminal pro-B-type natriuretic peptide

**Supplemental Table 3. Model Comparisons for All-Cause Mortality Endpoint (Censored at 30 Months)**

| Predictors                                                      | Harrell<br>C-index<br>(95% CI) | NRI<br>(95% CI) <sup>a</sup> | NRI for events<br>(95% CI) <sup>a</sup> | NRI for<br>non-events<br>(95% CI) <sup>a</sup> | Additional<br>cost, dollars | LR<br>p-value |
|-----------------------------------------------------------------|--------------------------------|------------------------------|-----------------------------------------|------------------------------------------------|-----------------------------|---------------|
| <b>Model comparisons without NT-proBNP (n=1631, 223 events)</b> |                                |                              |                                         |                                                |                             |               |
| Clinical information (C)                                        | 0.72<br>(0.68, 0.75)           |                              |                                         |                                                |                             |               |
| C + KCCQ total symptom score (K)                                | 0.72<br>(0.68, 0.75)           | 0.001<br>(-0.030, 0.033)     | 0.000<br>(-0.028, 0.028)                | 0.001<br>(-0.012, 0.015)                       | 0.00                        | 0.1374        |
| C + K + Laboratory assessments (L)                              | 0.74<br>(0.70, 0.77)           | 0.039<br>(-0.034, 0.112)     | 0.000<br>(-0.060, 0.060)                | 0.039<br>(-0.005, 0.083)                       | 11.63                       | <0.0001       |
| C + K + L + Echocardiography parameters (E)                     | 0.74<br>(0.71, 0.78)           | 0.045<br>(-0.043, 0.133)     | 0.000<br>(-0.064, 0.064)                | 0.045<br>(-0.002, 0.092)                       | 201.14                      | <0.0001       |
| C + K + L + E + Six-minute walk distance (S)                    | 0.75<br>(0.72, 0.78)           | 0.061<br>(-0.024, 0.147)     | 0.004<br>(-0.066, 0.075)                | 0.057<br>(0.020, 0.094)                        | 258.30                      | <0.0001       |
| C + K + L + E + S + Exercise parameters (full)                  | 0.77<br>(0.74, 0.80)           | 0.079<br>(0.001, 0.157)      | 0.009<br>(-0.060, 0.078)                | 0.070<br>(0.028, 0.112)                        | 425.69                      | <0.0001       |
| <b>Model comparisons with NT-proBNP (n=1023, 134 events)</b>    |                                |                              |                                         |                                                |                             |               |
| Clinical information (C)                                        | 0.73<br>(0.69, 0.78)           |                              |                                         |                                                |                             |               |
| C + KCCQ total symptom score (K)                                | 0.73<br>(0.69, 0.78)           | -0.004<br>(-0.035, 0.026)    | 0.000<br>(-0.030, 0.030)                | -0.004<br>(-0.020, 0.011)                      | 0.00                        | 0.7483        |
| C + K + Laboratory assessments (L)                              | 0.80<br>(0.76, 0.84)           | 0.091<br>(0.013, 0.169)      | 0.022<br>(-0.050, 0.094)                | 0.069<br>(0.025, 0.112)                        | 58.29                       | <0.0001       |
| C + K + L + Echocardiography parameters (E)                     | 0.80<br>(0.77, 0.84)           | 0.082<br>(-0.011, 0.175)     | 0.022<br>(-0.056, 0.101)                | 0.060<br>(0.013, 0.106)                        | 247.80                      | <0.0001       |
| C + K + L + E + Six-minute walk distance (S)                    | 0.81<br>(0.77, 0.84)           | 0.101<br>(0.014, 0.188)      | 0.030<br>(-0.050, 0.109)                | 0.071<br>(0.029, 0.113)                        | 304.96                      | <0.0001       |
| C + K + L + E + S + Exercise parameters (full)                  | 0.81<br>(0.78, 0.85)           | 0.094<br>(0.005, 0.184)      | 0.022<br>(-0.060, 0.104)                | 0.072<br>(0.029, 0.115)                        | 472.35                      | <0.0001       |

---

<sup>a</sup>The NRI compares each model to the model with clinical information only (C); it has 2 categories split at the incidence of death at 30 months, 0.14 in all patients and 0.13 in patients with non-missing NT-proBNP. The standard error for determining the 95% CI comes from the standard deviation of NRIs coming from 50 bootstrap samples with replacement.

Abbreviations: CI, confidence interval; KCCQ, Kansas City Cardiomyopathy Questionnaire; LR, likelihood ratio; NRI, Net Reclassification Index; NT-proBNP, N-terminal pro-B-type natriuretic peptide

**Supplemental Table 4. Model Comparisons for CV Death or HF Hospitalization Endpoint (Censored at 30 Months)**

| Predictors                                                      | Harrell C-index<br>(95% CI) | NRI<br>(95% CI) <sup>a</sup> | NRI<br>for events<br>(95% CI) <sup>a</sup> | NRI<br>for non-events<br>(95% CI) <sup>a</sup> | Additional cost,<br>dollars | LR p-value |
|-----------------------------------------------------------------|-----------------------------|------------------------------|--------------------------------------------|------------------------------------------------|-----------------------------|------------|
| <b>Model comparisons without NT proBNP (N=1631, 470 events)</b> |                             |                              |                                            |                                                |                             |            |
| Clinical information (C)                                        | 0.68<br>(0.66, 0.71)        |                              |                                            |                                                |                             |            |
| C + KCCQ Total Symptom Score (K)                                | 0.69<br>(0.66, 0.71)        | 0.009<br>(-0.035, 0.053)     | -0.002<br>(-0.034, 0.029)                  | 0.011<br>(-0.019, 0.041)                       | 0.00                        | <0.0001    |
| C + K + Laboratory assessments (L)                              | 0.71<br>(0.68, 0.73)        | 0.045<br>(-0.022, 0.112)     | 0.015<br>(-0.029, 0.059)                   | 0.030<br>(-0.008, 0.069)                       | 11.63                       | <0.0001    |
| C + K + L + Echocardiography parameters (E)                     | 0.73<br>(0.70, 0.75)        | 0.076<br>(0.009, 0.144)      | 0.017<br>(-0.031, 0.065)                   | 0.059<br>(0.012, 0.107)                        | 201.14                      | <0.0001    |
| C + K + L + E + Six-minute walk distance (S)                    | 0.73<br>(0.71, 0.76)        | 0.094<br>(0.024, 0.165)      | 0.021<br>(-0.026, 0.069)                   | 0.073<br>(0.027, 0.119)                        | 258.30                      | <0.0001    |
| C + K + L + E + S + Exercise parameters (full)                  | 0.74<br>(0.72, 0.76)        | 0.115<br>(0.051, 0.180)      | 0.049<br>(0.000, 0.098)                    | 0.066<br>(0.025, 0.108)                        | 425.69                      | <0.0001    |
| <b>Model comparisons with NT proBNP (N=1023, 304 events)</b>    |                             |                              |                                            |                                                |                             |            |
| Clinical information (C)                                        | 0.68<br>(0.65, 0.71)        |                              |                                            |                                                |                             |            |
| C + KCCQ Total Symptom Score (K)                                | 0.69<br>(0.66, 0.72)        | 0.008<br>(-0.039, 0.055)     | -0.013<br>(-0.051, 0.025)                  | 0.021<br>(-0.007, 0.049)                       | 0.00                        | 0.0005     |
| C + K + Laboratory assessments (L)                              | 0.75<br>(0.73, 0.78)        | 0.133<br>(0.069, 0.197)      | 0.049<br>(-0.002, 0.100)                   | 0.083<br>(0.044, 0.123)                        | 58.29                       | <0.0001    |
| C + K + L + Echocardiography parameters (E)                     | 0.76<br>(0.73, 0.79)        | 0.139<br>(0.081, 0.197)      | 0.053<br>(0.006, 0.099)                    | 0.086<br>(0.043, 0.130)                        | 247.80                      | <0.0001    |
| C + K + L + E + Six-minute walk distance (S)                    | 0.76<br>(0.73, 0.79)        | 0.151<br>(0.094, 0.208)      | 0.053<br>(0.009, 0.097)                    | 0.099<br>(0.057, 0.141)                        | 304.96                      | <0.0001    |
| C + K + L + E + S + Exercise parameters (full)                  | 0.76<br>(0.74, 0.79)        | 0.164<br>(0.107, 0.221)      | 0.063<br>(0.015, 0.110)                    | 0.102<br>(0.058, 0.145)                        | 472.35                      | <0.0001    |

---

<sup>a</sup>The NRI compares each model to the model with clinical information only (C); it has 2 categories split at the incidence of CV death or HF hospitalization at 30 months, 0.29 all patients and 0.30 in patients with non-missing NT-proBNP. The standard error for determining the 95% CI comes from the standard deviation of NRIs coming from 50 bootstrap samples with replacement.

Abbreviations: CI, confidence interval; KCCQ, Kansas City Cardiomyopathy Questionnaire; LR, likelihood ratio; NRI, Net Reclassification Index; NT-proBNP, N-terminal pro-B-type natriuretic peptide



**Supplemental Table 5. Current Prediction Models and Variables Used**

| Variable/Label                                                                                                 | DF | Wald<br>Chi-Square | Probability<br>Chi-Square |
|----------------------------------------------------------------------------------------------------------------|----|--------------------|---------------------------|
| Five most significant of added variables in <u>death or rehospitalization</u> endpoint<br>(without NT-proBNP)  |    |                    |                           |
| KCCQ total symptom score at baseline                                                                           | 1  | 9.6121             | 0.0019                    |
| Mitral regurgitation grade                                                                                     | 1  | 9.5303             | 0.0020                    |
| Peak VO <sub>2</sub>                                                                                           | 1  | 8.8083             | 0.0030                    |
| Creatinine                                                                                                     | 1  | 7.0696             | 0.0078                    |
| Exercise duration, CPX test (minutes)                                                                          | 1  | 5.5472             | 0.0185                    |
| Five most significant of added variables in <u>death or rehospitalization</u> endpoint<br>(with NT-proBNP)     |    |                    |                           |
| Log (NT-proBNP)                                                                                                | 1  | 17.7853            | <0.0001                   |
| KCCQ total symptom score at baseline                                                                           | 1  | 5.6253             | 0.0177                    |
| Exercise duration, CPX test (minutes)                                                                          | 1  | 4.4923             | 0.0340                    |
| Creatinine                                                                                                     | 1  | 3.4793             | 0.0621                    |
| LVEF                                                                                                           | 1  | 1.9280             | 0.1650                    |
| Five most significant of added variables in <u>death</u> endpoint (without NT-proBNP)                          |    |                    |                           |
| Mitral regurgitation grade                                                                                     | 1  | 8.6368             | 0.0033                    |
| Exercise duration, CPX test (minutes)                                                                          | 1  | 5.5665             | 0.0183                    |
| Creatinine                                                                                                     | 1  | 5.2462             | 0.0220                    |
| Peak VO <sub>2</sub> in mL/kg/min, CPX test                                                                    | 1  | 2.2200             | 0.1362                    |
| 6-minute walk distance (meters), subjects able to walk                                                         | 1  | 1.5093             | 0.2192                    |
| Five most significant of added variables in <u>death</u> endpoint (with NT-proBNP)                             |    |                    |                           |
| Log (NT-proBNP)                                                                                                | 1  | 21.6152            | <0.0001                   |
| Blood urea nitrogen in mg/dL                                                                                   | 1  | 3.7800             | 0.0519                    |
| Exercise duration, CPX test (minutes)                                                                          | 1  | 2.6402             | 0.1042                    |
| Mitral regurgitation grade                                                                                     | 1  | 2.2410             | 0.1344                    |
| 6-minute walk distance (meters), subjects able to walk                                                         | 1  | 1.6877             | 0.1939                    |
| Five most significant of added variables in <u>CV death/CV hospitalization</u> endpoint<br>(without NT-proBNP) |    |                    |                           |
| Mitral regurgitation grade                                                                                     | 1  | 17.2779            | <0.0001                   |
| LVEF                                                                                                           | 1  | 16.5280            | <0.0001                   |
| KCCQ total symptom score at baseline                                                                           | 1  | 11.0565            | 0.0009                    |
| Exercise duration, CPX test (minutes)                                                                          | 1  | 3.8128             | 0.0509                    |
| 6-minute walk distance, linear spline below 450                                                                | 1  | 2.8073             | 0.0938                    |

Five most significant of added variables in CV death/CV hospitalization endpoint  
(including NT-proBNP)

|                                       |   |         |         |
|---------------------------------------|---|---------|---------|
| Log (NT-proBNP)                       | 1 | 27.7975 | <0.0001 |
| KCCQ total symptom score at baseline  | 1 | 9.6313  | 0.0019  |
| LVEF                                  | 1 | 5.3356  | 0.0209  |
| Mitral regurgitation grade            | 1 | 4.7922  | 0.0286  |
| Exercise duration, CPX test (minutes) | 1 | 2.8436  | 0.0917  |

Five most significant of added variables in CV death/HF hospitalization endpoint  
(without NT-proBNP)

|                                                        |   |         |         |
|--------------------------------------------------------|---|---------|---------|
| Mitral regurgitation grade                             | 1 | 28.6995 | <0.0001 |
| LVEF                                                   | 1 | 12.2900 | 0.0005  |
| KCCQ total symptom score at baseline                   | 1 | 8.1082  | 0.0044  |
| Peak VO <sub>2</sub> in mL/kg/min, CPX test            | 1 | 6.8651  | 0.0088  |
| 6-minute walk distance (meters), subjects able to walk | 1 | 3.7015  | 0.0544  |

Five most significant of added variables in CV death/HF hospitalization endpoint  
(including NT-proBNP)

|                                                        |   |         |         |
|--------------------------------------------------------|---|---------|---------|
| Log (NT-proBNP)                                        | 1 | 28.8347 | <0.0001 |
| Mitral regurgitation grade                             | 1 | 11.3893 | 0.0007  |
| KCCQ total symptom score at baseline                   | 1 | 6.1648  | 0.0130  |
| BUN                                                    | 2 | 3.7597  | 0.1526  |
| 6-minute walk distance (meters), subjects able to walk | 1 | 1.8773  | 0.1706  |

---

Abbreviations: BUN, blood urea nitrogen; CPX, cardiopulmonary stress testing; CV, cardiovascular; DF, degree of freedom; HF, heart failure; KCCQ, Kansas City Cardiomyopathy Questionnaire; LVEF, left ventricular ejection fraction; NT-proBNP, N-terminal pro-B-type natriuretic peptide; VO<sub>2</sub>, oxygen consumption

**Supplemental Table 6. Model Comparisons for All-Cause Death and Hospitalization Endpoint (Censored at 30 Months)**

| Predictors                                                       | Harrell<br>C-index<br>(95% CI) | NRI<br>(95% CI) <sup>a</sup> | NRI for events<br>(95% CI) <sup>a</sup> | NRI for non-<br>events<br>(95% CI) <sup>a</sup> | Additional<br>cost, dollars | LR<br>p-value |
|------------------------------------------------------------------|--------------------------------|------------------------------|-----------------------------------------|-------------------------------------------------|-----------------------------|---------------|
| <b>Model comparisons without NT proBNP (N=1631, 1031 events)</b> |                                |                              |                                         |                                                 |                             |               |
| Clinical information (C)                                         | 0.62<br>(0.60, 0.64)           |                              |                                         |                                                 |                             |               |
| C + KCCQ Total Symptom Score (K)                                 | 0.63<br>(0.61, 0.64)           | 0.017<br>(-0.036, 0.071)     | -0.001<br>(-0.027, 0.025)               | 0.018<br>(-0.023, 0.059)                        | 0.00                        | <0.0001       |
| C + K + Six-minute walk distance (S)                             | 0.63<br>(0.62, 0.65)           | 0.017<br>(-0.039, 0.072)     | -0.012<br>(-0.036, 0.013)               | 0.028<br>(-0.019, 0.075)                        | 258.30                      | <0.0001       |
| C + K + S + Laboratory assessments (L)                           | 0.64<br>(0.62, 0.66)           | 0.065<br>(0.004, 0.126)      | 0.000<br>(-0.032, 0.032)                | 0.065<br>(0.015, 0.115)                         | 11.63                       | <0.0001       |
| C + K + S + L + Echocardiography parameters (E)                  | 0.65<br>(0.63, 0.66)           | 0.079<br>(0.017, 0.141)      | 0.011<br>(-0.024, 0.046)                | 0.068<br>(0.023, 0.114)                         | 201.14                      | <0.0001       |
| C + K + S + L + E + Exercise parameters (full)                   | 0.65<br>(0.64, 0.67)           | 0.109<br>(0.037, 0.181)      | 0.029<br>(-0.013, 0.071)                | 0.080<br>(0.026, 0.134)                         | 425.69                      | <0.0001       |
| <b>Model comparisons with NT proBNP (N=1023, 646 events)</b>     |                                |                              |                                         |                                                 |                             |               |
| Clinical information (C)                                         | 0.63<br>(0.61, 0.65)           |                              |                                         |                                                 |                             |               |
| C + KCCQ Total Symptom Score (K)                                 | 0.64<br>(0.61, 0.66)           | 0.016<br>(-0.036, 0.068)     | 0.000<br>(-0.026, 0.026)                | 0.016<br>(-0.025, 0.056)                        | 0.00                        | 0.0020        |
| C + K + Six-minute walk distance (S)                             | 0.64<br>(0.62, 0.67)           | 0.016<br>(-0.040, 0.071)     | 0.008<br>(-0.016, 0.031)                | 0.008<br>(-0.040, 0.056)                        | 304.96                      | <0.0001       |
| C + K + S + Laboratory assessments (L)                           | 0.67<br>(0.65, 0.69)           | 0.130<br>(0.067, 0.194)      | 0.040<br>(-0.002, 0.083)                | 0.090<br>(0.041, 0.139)                         | 58.29                       | <0.0001       |

|                                                 |                      |                         |                          |                         |        |         |
|-------------------------------------------------|----------------------|-------------------------|--------------------------|-------------------------|--------|---------|
| C + K + S + L + Echocardiography parameters (E) | 0.67<br>(0.65, 0.69) | 0.140<br>(0.078, 0.202) | 0.042<br>(-0.003, 0.086) | 0.098<br>(0.055, 0.141) | 247.80 | <0.0001 |
| C + K + S + L + E + Exercise parameters (full)  | 0.67<br>(0.65, 0.69) | 0.162<br>(0.090, 0.233) | 0.056<br>(0.007, 0.104)  | 0.106<br>(0.052, 0.160) | 472.35 | <0.0001 |

---

<sup>a</sup>The NRI compares each model to the model with clinical information only (C); it has 2 categories split at the incidence of death at 30 months, 0.14 in all patients and 0.13 in patients with non-missing NT-proBNP. The standard error for determining the 95% CI comes from the standard deviation of NRIs coming from 50 bootstrap samples with replacement.

Abbreviations: CI, confidence interval; KCCQ, Kansas City Cardiomyopathy Questionnaire; LR, likelihood ratio; NRI, Net Reclassification Index; NT-proBNP, N-terminal pro-B-type natriuretic peptide

**Supplemental Table 7. Model Comparisons for All-Cause Death Endpoint (Censored at 30 Months)**

| Predictors                                                      | Harrell<br>C-index<br>(95% CI) | NRI<br>(95% CI) <sup>a</sup> | NRI for events<br>(95% CI) <sup>a</sup> | NRI for non-<br>events<br>(95% CI) <sup>a</sup> | Additional<br>cost, dollars | LR<br>p-value |
|-----------------------------------------------------------------|--------------------------------|------------------------------|-----------------------------------------|-------------------------------------------------|-----------------------------|---------------|
| <b>Model comparisons without NT proBNP (N=1631, 223 events)</b> |                                |                              |                                         |                                                 |                             |               |
| Clinical information (C)                                        | 0.72<br>(0.68, 0.75)           |                              |                                         |                                                 |                             |               |
| C + KCCQ Total Symptom Score (K)                                | 0.72<br>(0.68, 0.75)           | 0.001<br>(-0.030, 0.033)     | 0.000<br>(-0.028, 0.028)                | 0.001<br>(-0.012, 0.015)                        | 0.00                        | 0.1374        |
| C + K + Six-minute walk distance (S)                            | 0.73<br>(0.70, 0.76)           | 0.007<br>(-0.062, 0.076)     | -0.018<br>(-0.076, 0.040)               | 0.025<br>(0.000, 0.050)                         | 258.30                      | <0.0001       |
| C + K + S + Laboratory assessments (L)                          | 0.74<br>(0.71, 0.78)           | 0.056<br>(-0.016, 0.128)     | 0.009<br>(-0.057, 0.075)                | 0.047<br>(0.010, 0.083)                         | 11.63                       | <0.0001       |
| C + K + S + L + Echocardiography parameters (E)                 | 0.75<br>(0.72, 0.78)           | 0.061<br>(-0.024, 0.147)     | 0.004<br>(-0.066, 0.075)                | 0.057<br>(0.020, 0.094)                         | 201.14                      | <0.0001       |
| C + K + S + L + E + Exercise parameters (full)                  | 0.77<br>(0.74, 0.80)           | 0.079<br>(0.001, 0.157)      | 0.009<br>(-0.060, 0.078)                | 0.070<br>(0.028, 0.112)                         | 425.69                      | <0.0001       |
| <b>Model comparisons with NT proBNP (N=1023, 134 events)</b>    |                                |                              |                                         |                                                 |                             |               |
| Clinical information (C)                                        | 0.73<br>(0.69, 0.78)           |                              |                                         |                                                 |                             |               |
| C + KCCQ Total Symptom Score (K)                                | 0.73<br>(0.69, 0.78)           | -0.004<br>(-0.035, 0.026)    | 0.000<br>(-0.030, 0.030)                | -0.004 (-0.020,<br>0.011)                       | 0.00                        | 0.7483        |
| C + K + Six-minute walk distance (S)                            | 0.75<br>(0.71, 0.79)           | 0.014<br>(-0.051, 0.079)     | -0.007<br>(-0.065, 0.050)               | 0.021 (-0.004,<br>0.046)                        | 304.96                      | 0.0010        |

|                                                 |                      |                         |                          |                         |        |         |
|-------------------------------------------------|----------------------|-------------------------|--------------------------|-------------------------|--------|---------|
| C + K + S + Laboratory assessments (L)          | 0.81<br>(0.77, 0.84) | 0.085<br>(0.006, 0.164) | 0.015<br>(-0.058, 0.088) | 0.070 (0.031,<br>0.108) | 58.29  | <0.0001 |
| C + K + S + L + Echocardiography parameters (E) | 0.81<br>(0.77, 0.84) | 0.101<br>(0.014, 0.188) | 0.030<br>(-0.050, 0.109) | 0.071 (0.029,<br>0.113) | 247.80 | <0.0001 |
| C + K + S + L + E + Exercise parameters (full)  | 0.81<br>(0.78, 0.85) | 0.094<br>(0.005, 0.184) | 0.022<br>(-0.060, 0.104) | 0.072 (0.029,<br>0.115) | 472.35 | <0.0001 |

<sup>a</sup>The NRI compares each model to the model with clinical information only (C); it has 2 categories split at the incidence of death at 30 months, 0.14 in all patients and 0.13 in patients with non-missing NT-proBNP. The standard error for determining the 95% CI comes from the standard deviation of NRIs coming from 50 bootstrap samples with replacement.

Abbreviations: CI, confidence interval; KCCQ, Kansas City Cardiomyopathy Questionnaire; LR, likelihood ratio; NRI, Net Reclassification Index; NT-proBNP, N-terminal pro-B-type natriuretic peptide

**Supplemental Table 8. Model comparisons for CV death or HF hospitalization endpoint (censored at 30 months)**

| Predictors                                                      | Harrell C-index<br>(95% CI) | NRI (95% CI) <sup>a</sup> | NRI for events<br>(95% CI) <sup>a</sup> | NRI for non-events<br>(95% CI) <sup>a</sup> | Additional cost,<br>dollars | LR<br>p-value |
|-----------------------------------------------------------------|-----------------------------|---------------------------|-----------------------------------------|---------------------------------------------|-----------------------------|---------------|
| <b>Model comparisons without NT proBNP (N=1631, 470 events)</b> |                             |                           |                                         |                                             |                             |               |
| Clinical information (C)                                        | 0.68<br>(0.66, 0.71)        |                           |                                         |                                             |                             |               |
| C + KCCQ Total Symptom Score (K)                                | 0.69<br>(0.66, 0.71)        | 0.009<br>(-0.035, 0.053)  | -0.002<br>(-0.034, 0.029)               | 0.011<br>(-0.019, 0.041)                    | 0.00                        | <0.0001       |
| C + K + Six-minute walk distance (S)                            | 0.70<br>(0.67, 0.72)        | 0.026<br>(-0.024, 0.076)  | 0.000<br>(-0.036, 0.036)                | 0.026<br>(-0.011, 0.063)                    | 258.30                      | <0.0001       |
| C + K + S + Laboratory assessments (L)                          | 0.71<br>(0.69, 0.74)        | 0.056<br>(-0.009, 0.121)  | 0.000<br>(-0.045, 0.045)                | 0.056<br>(0.018, 0.094)                     | 11.63                       | <0.0001       |
| C + K + S + L + Echocardiography parameters (E)                 | 0.73<br>(0.71, 0.76)        | 0.094<br>(0.024, 0.165)   | 0.021<br>(-0.026, 0.069)                | 0.073<br>(0.027, 0.119)                     | 201.14                      | <0.0001       |
| C + K + S + L + E + Exercise parameters (full)                  | 0.74<br>(0.72, 0.76)        | 0.115<br>(0.051, 0.180)   | 0.049<br>(0.000, 0.098)                 | 0.066<br>(0.025, 0.108)                     | 425.69                      | <0.0001       |
| <b>Model comparisons with NT proBNP (N=1023, 304 events)</b>    |                             |                           |                                         |                                             |                             |               |
| Clinical information (C)                                        | 0.68<br>(0.65, 0.71)        |                           |                                         |                                             |                             |               |
| C + KCCQ Total Symptom Score (K)                                | 0.69<br>(0.66, 0.72)        | 0.008<br>(-0.039, 0.055)  | -0.013<br>(-0.051, 0.025)               | 0.021<br>(-0.007, 0.049)                    | 0.00                        | 0.0005        |
| C + K + Six-minute walk distance (S)                            | 0.70<br>(0.67, 0.73)        | 0.056<br>(0.003, 0.108)   | 0.020<br>(-0.017, 0.056)                | 0.036<br>(0.005, 0.068)                     | 304.96                      | <0.0001       |

|                                                 |                      |                         |                         |                         |        |         |
|-------------------------------------------------|----------------------|-------------------------|-------------------------|-------------------------|--------|---------|
| C + K + S + Laboratory assessments (L)          | 0.75<br>(0.73, 0.78) | 0.153<br>(0.097, 0.210) | 0.056<br>(0.008, 0.104) | 0.097<br>(0.060, 0.135) | 58.29  | <0.0001 |
| C + K + S + L + Echocardiography parameters (E) | 0.76<br>(0.73, 0.79) | 0.151<br>(0.094, 0.208) | 0.053<br>(0.009, 0.097) | 0.099<br>(0.057, 0.141) | 247.80 | <0.0001 |
| C + K + S + L + E + Exercise parameters (full)  | 0.76<br>(0.74, 0.79) | 0.164<br>(0.107, 0.221) | 0.063<br>(0.015, 0.110) | 0.102<br>(0.058, 0.145) | 472.35 | <0.0001 |

<sup>a</sup>The NRI compares each model to the model with clinical information only (C); it has 2 categories split at the incidence of death at 30 months, 0.14 in all patients and 0.13 in patients with non-missing NT-proBNP. The standard error for determining the 95% CI comes from the standard deviation of NRIs coming from 50 bootstrap samples with replacement.

Abbreviations: CI, confidence interval; KCCQ, Kansas City Cardiomyopathy Questionnaire; LR, likelihood ratio; NRI, Net Reclassification Index; NT-proBNP, N-terminal pro-B-type natriuretic peptide



**Supplemental Table 9. Current Prediction Models and Variables Used**

| <b>Risk Score</b>              | <b>Variables Used</b>                                                                                                                                                                                                                                                                                                                                                                                                                                                                                                                                     | <b>Outcome</b>      | <b>C-Statistic</b> |
|--------------------------------|-----------------------------------------------------------------------------------------------------------------------------------------------------------------------------------------------------------------------------------------------------------------------------------------------------------------------------------------------------------------------------------------------------------------------------------------------------------------------------------------------------------------------------------------------------------|---------------------|--------------------|
| CHARM <sup>1</sup>             | <ul style="list-style-type: none"> <li>• Age</li> <li>• Ejection fraction</li> <li>• DM</li> <li>• BMI</li> <li>• Female sex</li> <li>• NYHA class III/IV</li> <li>• Current smoker</li> <li>• Bundle branch block</li> <li>• Cardiomegaly</li> <li>• Prior HF hospitalization</li> <li>• DBP</li> <li>• Diagnosis of HF</li> <li>• Previous MI</li> <li>• Dependent edema</li> <li>• HR</li> <li>• Pulmonary crackles</li> <li>• Pulmonary edema</li> <li>• Mitral regurgitation</li> <li>• AF</li> <li>• Rest dyspnea</li> <li>• Candesartan</li> </ul> | All-cause mortality | 0.75               |
| CORONA <sup>2</sup>            | <ul style="list-style-type: none"> <li>• NT-proBNP</li> <li>• Age</li> <li>• DM</li> <li>• LVEF</li> <li>• BMI</li> <li>• CABG</li> <li>• Female sex</li> <li>• AF</li> <li>• NYHA class</li> <li>• ApoA-1</li> <li>• Serum creatinine</li> <li>• Intermittent claudication</li> <li>• HR</li> <li>• MI</li> </ul>                                                                                                                                                                                                                                        | All-cause mortality | 0.72               |
| HF Survival Score <sup>3</sup> | <ul style="list-style-type: none"> <li>• Ischemic cardiomyopathy</li> <li>• Resting HR LVEF</li> <li>• IVCD (QRS duration <math>\geq 0.12</math> second of any cause)</li> <li>• Mean resting blood pressure</li> <li>• Peak <math>\dot{V}O_2</math></li> <li>• Serum sodium</li> </ul>                                                                                                                                                                                                                                                                   | All-cause mortality | 0.56–0.79          |

|                                                                  |                                                                                                                                                                                                                                                                                                                                                                                                                |                     |      |
|------------------------------------------------------------------|----------------------------------------------------------------------------------------------------------------------------------------------------------------------------------------------------------------------------------------------------------------------------------------------------------------------------------------------------------------------------------------------------------------|---------------------|------|
| Seattle HF Model <sup>4</sup>                                    | <ul style="list-style-type: none"> <li>• Age</li> <li>• Sex</li> <li>• Ischemic etiology</li> <li>• NYHA class</li> <li>• Ejection fraction</li> <li>• SBP</li> <li>• Potassium-sparing diuretic use</li> <li>• Statin use</li> <li>• Allopurinol use</li> <li>• Hemoglobin</li> <li>• % lymphocyte count</li> <li>• Uric acid</li> <li>• Sodium</li> <li>• Cholesterol</li> <li>• Diuretic dose/kg</li> </ul> | All-cause mortality | 0.73 |
| HF-ACTION Predictive Risk Score Model (abbreviated) <sup>5</sup> | <ul style="list-style-type: none"> <li>• Exercise duration</li> <li>• BUN</li> <li>• Sex</li> <li>• BMI</li> </ul>                                                                                                                                                                                                                                                                                             | All-cause mortality | 0.73 |
| HF-ACTION Predictive Risk Score Model (full) <sup>5</sup>        | <ul style="list-style-type: none"> <li>• Sex</li> <li>• Race</li> <li>• BUN</li> <li>• BMI</li> <li>• DBP</li> <li>• KCCQ</li> <li>• LVEF</li> <li>• Exercise duration</li> <li>• Ventricular conduction</li> <li>• Mitral regurgitation</li> </ul>                                                                                                                                                            | All-cause mortality | 0.74 |
| Incremental value score<br>Baseline clinical assessment and QOL  | <ul style="list-style-type: none"> <li>• Age</li> <li>• Sex</li> <li>• Race</li> <li>• SBP</li> <li>• DBP</li> <li>• HR</li> <li>• BMI</li> <li>• NYHA class</li> <li>• DM</li> <li>• Dyslipidemia</li> <li>• COPD</li> <li>• PVD</li> <li>• AF</li> <li>• Stroke</li> <li>• Depression</li> <li>• Prior HF hospitalization</li> </ul>                                                                         | All-cause mortality | 0.73 |

|                                               |                                                                                                                                                                                 |      |
|-----------------------------------------------|---------------------------------------------------------------------------------------------------------------------------------------------------------------------------------|------|
|                                               | <ul style="list-style-type: none"> <li>• HF etiology</li> <li>• CCS angina class</li> <li>• Education level</li> <li>• Marital and employment status</li> <li>• KCCQ</li> </ul> |      |
| + Laboratory assessments including NT-proBNP) | <ul style="list-style-type: none"> <li>• Sodium</li> <li>• Creatinine</li> <li>• BUN</li> <li>• NT-proBNP</li> </ul>                                                            | 0.80 |
| + Echocardiographic parameters                | <ul style="list-style-type: none"> <li>• LVEF</li> <li>• Mitral regurgitation</li> </ul>                                                                                        | 0.80 |
| + Exercise parameters                         | <ul style="list-style-type: none"> <li>• Peak VO<sub>2</sub></li> <li>• Exercise duration</li> <li>• 6MWD</li> </ul>                                                            | 0.81 |

---

Abbreviations: AF, atrial fibrillation; ApoA-1, apolipoprotein A-1; BMI, body mass index; BUN, blood urea nitrogen; CABG, coronary artery bypass grafting; CCS, Canadian Cardiomyopathy Society; CHARM, Candesartan in Heart Failure-Assessment of Reduction in Mortality and Morbidity; COPD, chronic obstructive pulmonary disease; CORONA, Controlled Rosuvastatin Multinational Study in Heart Failure; DBP, diastolic blood pressure; DM, diabetes mellitus; HF, heart failure; HR, heart rate; IVCD, intraventricular conduction delay; KCCQ, Kansas City Cardiomyopathy Questionnaire; LVEF, left ventricular ejection fraction; MI, myocardial infarction; NT-proBNP, N-terminal pro-B-type natriuretic peptide; NYHA, New York Heart Association; PVD, peripheral vascular disease; SBP, systolic blood pressure; VO<sub>2</sub>, oxygen consumption; 6MWD, six-minute walk distance

## Supplemental References

1. Pocock SJ, Wang D, Pfeffer MA, Yusuf S, McMurray JJ, Swedberg KB, Ostergren J, Michelson EL, Pieper KS, Granger CB. Predictors of mortality and morbidity in patients with chronic heart failure. *Eur Heart J*. 2006;27:65-75.
2. Wedel H, McMurray JJ, Lindberg M, Wikstrand J, Cleland JG, Cornel JH, Dunselman P, Hjalmarson A, Kjekshus J, Komajda M, Kuusi T, Vanhaecke J, Waagstein F; CORONA Study Group. Predictors of fatal and non-fatal outcomes in the Controlled Rosuvastatin Multinational Trial in Heart Failure (CORONA): incremental value of apolipoprotein A-1, high-sensitivity C-reactive peptide and N-terminal pro B-type natriuretic peptide. *Eur J Heart Fail*. 2009;11:281-291.
3. Alba AC, Agoritsas T, Jankowski M, Courvoisier D, Walter SD, Guyatt GH, Ross HJ. Risk prediction models for mortality in ambulatory patients with heart failure: a systematic review. *Circ Heart Fail*. 2013;6:881-889.
4. Levy WC, Mozaffarian D, Linker DT, Sutradhar SC, Anker SD, Cropp AB, Anand I, Maggioni A, Burton P, Sullivan MD, Pitt B, Poole-Wilson PA, Mann DL, Packer M. The Seattle Heart Failure Model: prediction of survival in heart failure. *Circulation*. 2006;113:1424-1433.
5. O'Connor CM, Whellan DJ, Wojdyla D, Leifer E, Clare RM, Ellis SJ, Fine LJ, Fleg JL, Zannad F, Keteyian SJ, Kitzman DW, Kraus WE, Rendall D, Piña IL, Cooper LS, Fiuzat M, Lee KL. Factors related to morbidity and mortality in patients with chronic heart failure with systolic dysfunction: the HF-ACTION predictive risk score model. *Circ Heart Fail*. 2012;5:63-71.
